# Supplementary material for: Rigid, yet flexible: formation of unprecedented silver MB-DIPY dimers with orthogonal chromophore geometry
Source: Royal Society of Chemistry journal article supplement (doi:10.1039/d0dt00927j), 2020-01-01
Supplement: d0dt00927j1.pdf [file d0dt00927j1.pdf]

**Rigid, Yet Flexible: Formation of the Unprecedented Silver MB-DIPY Dimers with  
Orthogonal Chromophore Geometry**

Yuriy V. Zatsikha,\* Liliya I. Shamova, Tanner S. Blesener, David E. Herbert, and Victor N. Nemykin\*

**SUPPORTING INFORMATION**

## Table of Contents

|                                                                                                         |  |
|---------------------------------------------------------------------------------------------------------|--|
| EXPERIMENTAL SECTION AND ACKNOWLEDGEMENT .....                                                          |  |
| $^1\text{H}$ NMR Figures of MB-DIPY <sub>2</sub> Ag <sub>2</sub> <b>2a</b> and <b>2b</b> .....          |  |
| APCI High-Resolution Mass Spectra of MB-DIPY <sub>2</sub> Ag <sub>2</sub> <b>2a</b> and <b>2b</b> ..... |  |
| Absorption Spectra of MB-DIPY <sub>2</sub> Ag <sub>2</sub> <b>2b</b> .....                              |  |
| Electrochemical Studies of MB-DIPY <sub>2</sub> Ag <sub>2</sub> <b>2a</b> and <b>2b</b> .....           |  |
| DFT Calculations.....                                                                                   |  |

## EXPERIMENTAL SECTION

**Materials.** Solvents were purified using standard approaches: THF, 1,4-dioxane were dried over sodium metal and benzophenone, DCM, MeCN, DMF were dried over phosphorus(V) oxide. Compounds **1a** and **1b** were synthesized as described before <sup>[1]</sup>. Silver nitrate was purchased from Sigma Aldrich.

**Spectroscopy Measurements.** Jasco-V770 spectrophotometer was used to collect UV-Vis data. Electrochemical cyclic voltammetry (CV) and differential pulse voltammetry (DPV) measurements were conducted using a CHI-620 C electrochemical analyzer utilizing a three-electrode scheme with platinum working, auxiliary and Ag/AgCl reference electrodes. DCM was used as solvent and 0.1 M solution of tetrabutylammonium perchlorate (TBAP). In all cases, experimental redox potentials were corrected using decamethylferrocene (Fc\*H) as an internal standard. NMR spectra were recorded a Bruker Avance instrument with a 300 MHz frequency for protons. Chemical shifts are reported in parts per million (ppm) and referenced to the residual proton resonance of the deuterated solvent (CDCl<sub>3</sub> =  $\delta$  7.26). High-resolution mass spectra of all new compounds were recorded using a Bruker micrOTOF-QIII. All exact mass measurements showed an error of less than 5 ppm.

**Computational Details.** The starting geometries of MB-DIPY<sub>2</sub>Ag<sub>2</sub> **2a** and **2b** were optimized using a hybrid B3LYP exchange-correlation functional <sup>[2]</sup>. Solvent effects were calculated using the polarized continuum model (PCM) <sup>[3]</sup>. In all calculations, DCM was used as the solvent. In PCM-TDDFT calculations, the first 50 states were calculated. In all calculations 20s16p9d2f1g full-electron basis set <sup>[4]</sup> was utilized for silver atoms, while all other atoms were modeled using 6-31G(d) basis set <sup>[5]</sup>. Gaussian 09 software was used in all calculations <sup>[6]</sup>. QMForge program was used for molecular orbital analysis <sup>[7]</sup>.

### X-ray Experimental Details.

A dark purple, multi-faceted block of suitable size (0.082 x 0.055 x 0.032 mm) and quality was selected from a representative sample of crystals of the same habit using an optical microscope and mounted onto a MiTiGen loop. X-ray data were obtained on a Bruker D8 QUEST ECO CMOS diffractometer (Mo sealed X-ray tube,  $K_{\alpha}$  = 0.71073 Å) at 150 K. All diffractometer manipulations, including data collection, integration and scaling were carried out using the Bruker APEX3 software suite.<sup>[8]</sup> An absorption correction was applied using SADABS.<sup>[8]</sup> The space group was determined on the basis of systematic absences and intensity statistics and the structure was solved by direct methods and refined by full-matrix least squares on  $F^2$ . The structure was solved in the monoclinic space group *P*-1 using XS<sup>[9]</sup> (incorporated in SHELXTL). No obvious missed symmetry was reported by PLATON.<sup>[10]</sup> “Flip”-type disorder<sup>[11]</sup> was observed for two thiophenyl side chains, wherein different types of atoms (sulfur and

carbon) occupy positions that are close to each other. This influences their thermal parameters, which were therefore equated for each pair of disordered atoms in the disordered rings. All non-hydrogen atoms were refined with anisotropic thermal parameters. Hydrogen atoms, including those on disordered atoms, were placed in idealized positions and refined using a riding model. The structure was refined (weighted least squares refinement on  $F^2$ ) and the final least-squares refinement converged to  $R_1 = 0.0554$  ( $I > 2\sigma(I)$ , 7340 data) and  $wR_2 = 0.1482$  ( $F^2$ , 11041 data, 671 parameters).

### General procedure for synthesis of compounds **2a** and **2b**

The solution of compounds **1a**, **1b** (0.1 mmol) in dry acetonitrile (10 mL) was treated with the solution of  $\text{AgNO}_3$  (0.11 mmol, 19 mg) in acetonitrile (3 mL). The resulting solution was stirred for 40 min at room temperature. The resulting precipitate was collected by vacuum filtration and air-dried to give pure silver complexes **2a** and **2b**.

**Compound 2a.** Yield 54 mg (90 %).  $^1\text{H NMR}$  (300 MHz,  $\text{CDCl}_3$ )  $\delta$  7.65 – 7.37 (m, 18H), 7.22 – 7.16 (m, 6H), 7.03 (s, 4H), 6.37 (s, 4H); HRMS (APCI-TOF)  $m/z$ :  $[\text{M}+\text{H}]^+$  Calcd for  $\text{C}_{56}\text{H}_{32}\text{N}_6\text{O}_4\text{S}_4\text{Ag}_2$  1196.9542; Found 1196.9532.

**Compound 2b.** Yield 48 mg (83 %).  $^1\text{H NMR}$  (300 MHz,  $\text{CDCl}_3$ )  $\delta$  7.54 – 7.28 (m, 28H), 7.20 – 7.13 (m, 8H), 6.46 (s, 4H); HRMS (APCI-TOF)  $m/z$ :  $[\text{M}+\text{H}]^+$  Calcd for  $\text{C}_{64}\text{H}_{40}\text{N}_6\text{O}_4\text{Ag}_2$  1173.1291; Found 1173.1314.

### ACKNOWLEDGEMENT

Generous support from the Minnesota Supercomputing Institute, NSERC, CFI, University of Manitoba, and WestGrid Canada to VN is greatly appreciated. We wish to acknowledge Gabriel Cohen for the help with some experimental work.

## References

1. Y. V. Zatsikha, L. I. Shamova, T. S. Blesener, I. A. Kuzmin, Y. V. Germanov, D. E. Herbert and V. N. Nemykin, *J. Org. Chem.*, 2019, **84**, 14540-14557.
2. (a) Becke AD. Becke's three parameter hybrid method using the LYP correlation functional. *J. Chem. Phys.* **1993**, *98*, 5648-5652. (b) Lee C, Yang W. Parr RG, Development of the Colle-Salvetti correlation-energy formula into a functional of the electron density. *Phys. Rev., B* **1988**, *37*, 785-789.
3. Tomasi J, Mennucci B, Cammi R. Quantum mechanical continuum solvation models. *Chem. Rev.*, **2005**, *105*, 2999-3093.
4. (a) B. P. Pritchard, D. Altarawy, B. Didier, T. D. Gibson and T. L. Windus. *J. Chem. Inf. Model.* **2019**, *59*, 4814-4820; (b) F. E. Jorge, A. Canal Neto, G. G. Camilletti and S. F. Machado *J. Chem. Phys.*, 2009, **130**, 064108.
5. McLean, A. D.; Chandler, G. S. Contracted Gaussian basis sets for molecular calculations. I. Second row atoms, Z= 11–18. *J. Chem. Phys.*, **1980**, *72*, 5639-5648.
6. Gaussian 09, Revision D.1, Frisch MJ, Trucks GW, Schlegel HB, Scuseria GE et al Gaussian, Inc., Wallingford CT, **2009**.
7. Tenderholt AL. QMForge, Version 2.1. Stanford University, Stanford, CA, USA.
8. Bruker-AXS APEX3 v2016.1-0, Madison, Wisconsin, USA, 2016.
9. Sheldrick, G.M. A short history of *SHELX*. *Acta Cryst.* **2008**, *A64*, 112-122.
10. Spek, A.L. Structure validation in chemical crystallography. *Acta Cryst.* **2009**, *D65*, 148-155.
11. (a) Bellizzi, M.; Foss, P. C. D.; Pelto, R.; Crundwell, G.; Brueckner, C.; Updegraff, J. B., III; Zeller, M.; Hunter, A. D. *Zeitschrift fuer Kristallographie* (2004), *219*(2), 129-131. (b) Wagner, P.; Officer, D. L.; Kubicki, M. *Acta Cryst., Section E* (2006), *62*(12), o5745-o5747.

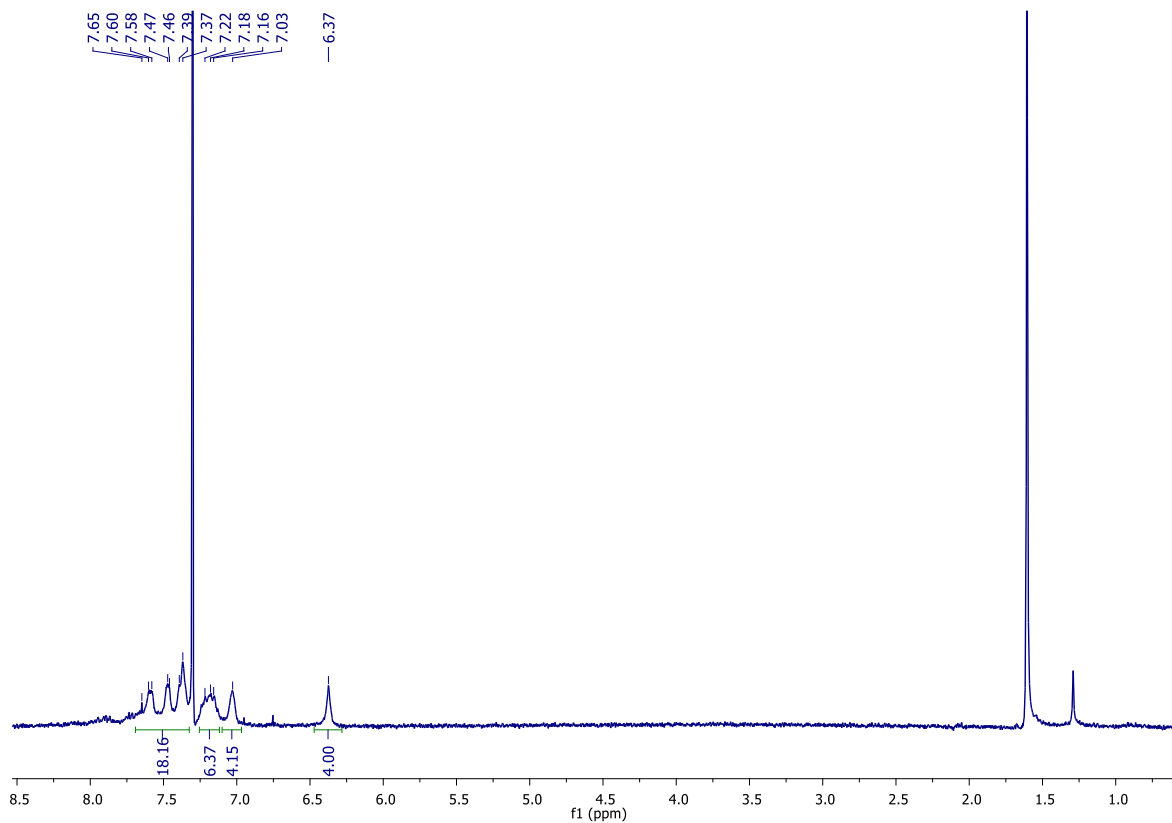

**Figure S1.** <sup>1</sup>H NMR spectrum of compound **2a** in CDCl<sub>3</sub>

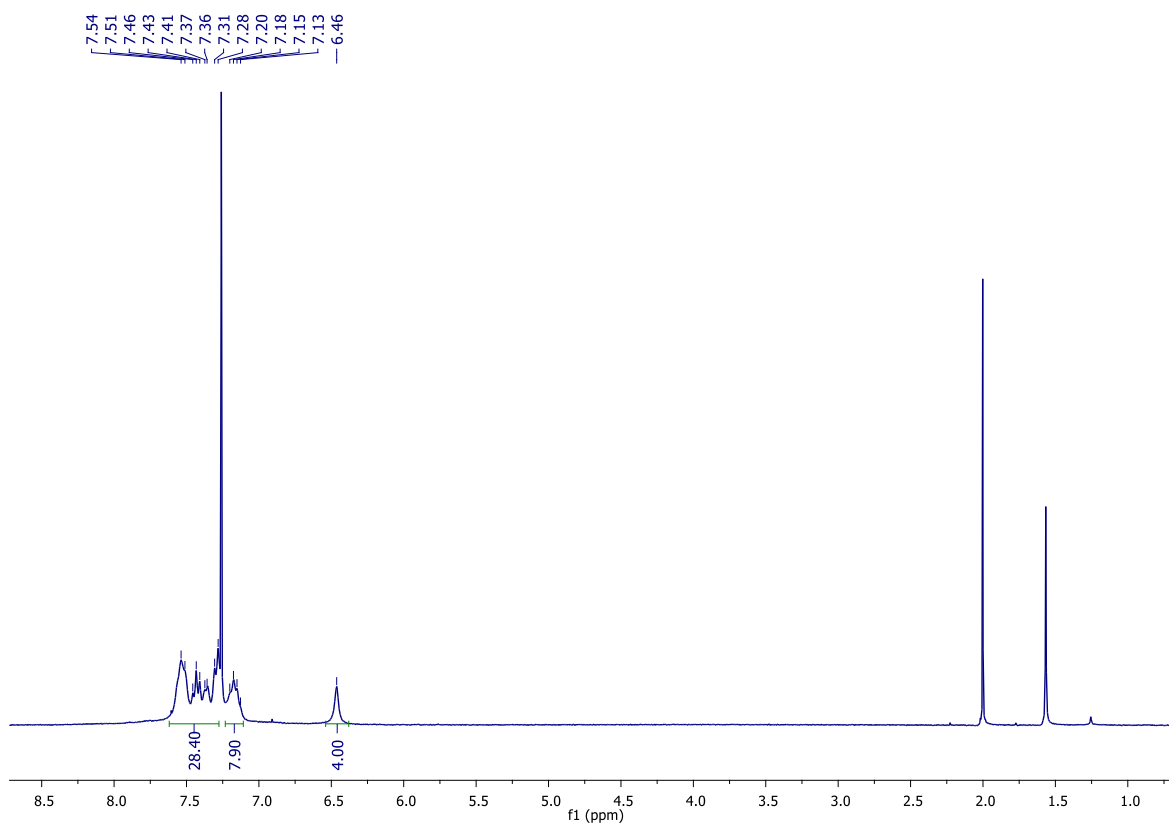

**Figure S2.** <sup>1</sup>H NMR spectrum of compound **2b** in CDCl<sub>3</sub>

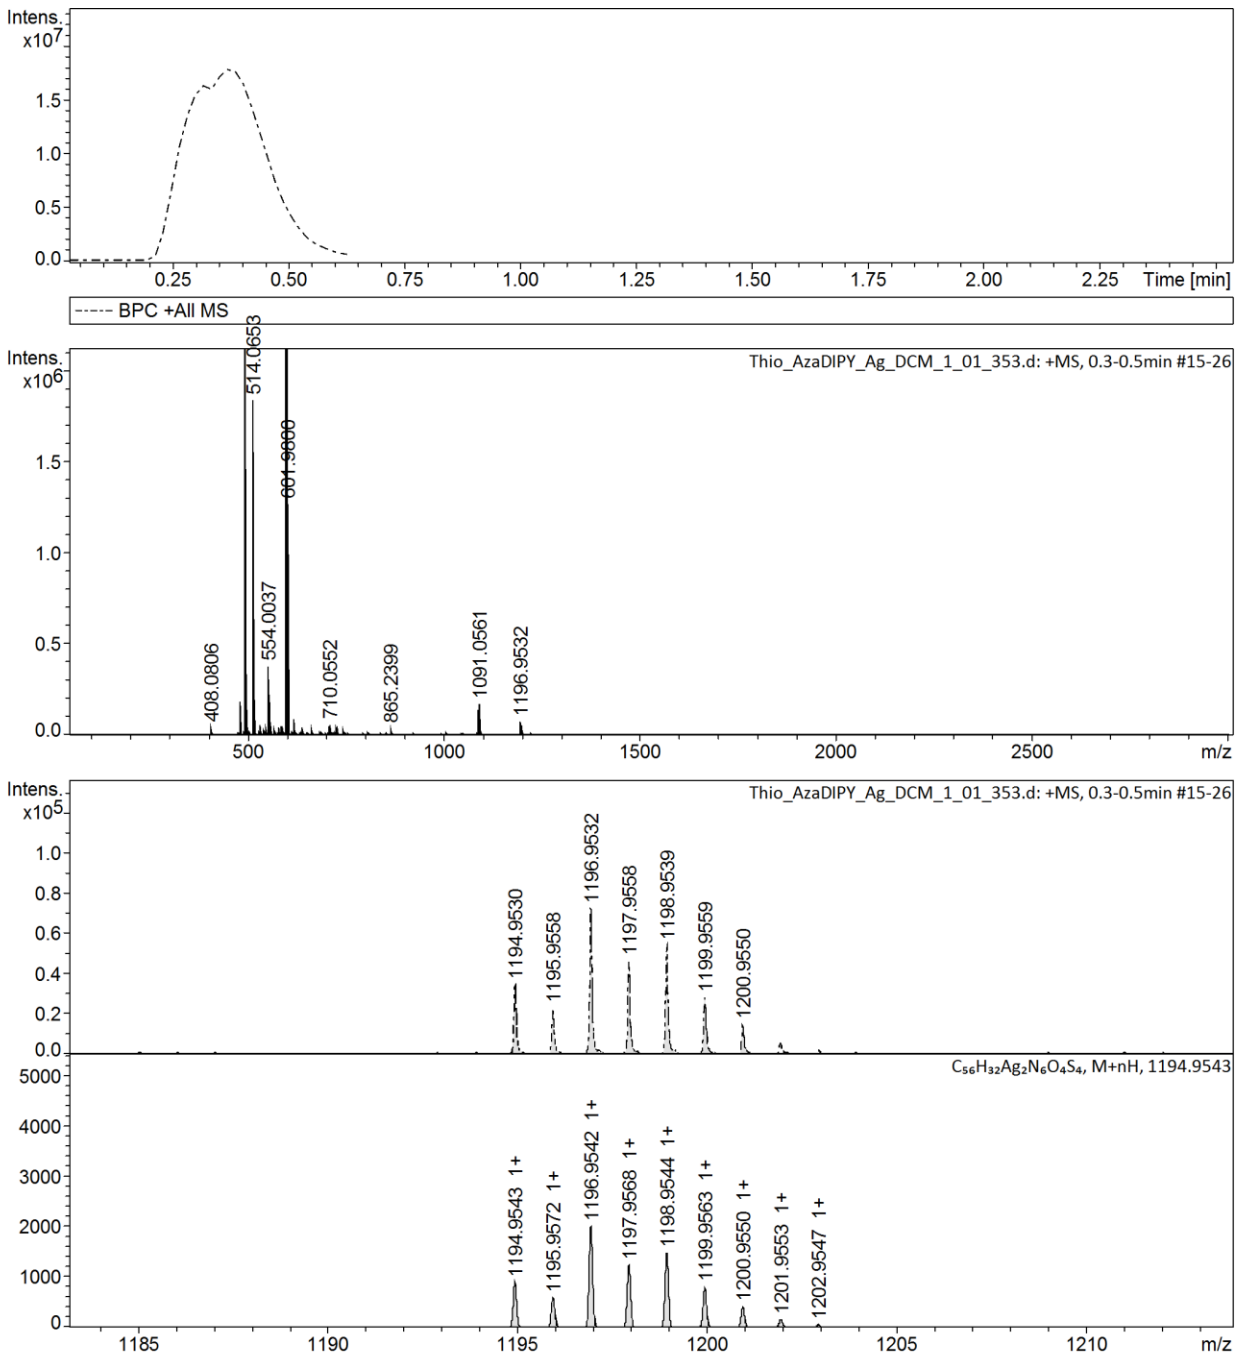

**Figure S3.** APCI high-resolution mass spectrum of compound **2a**

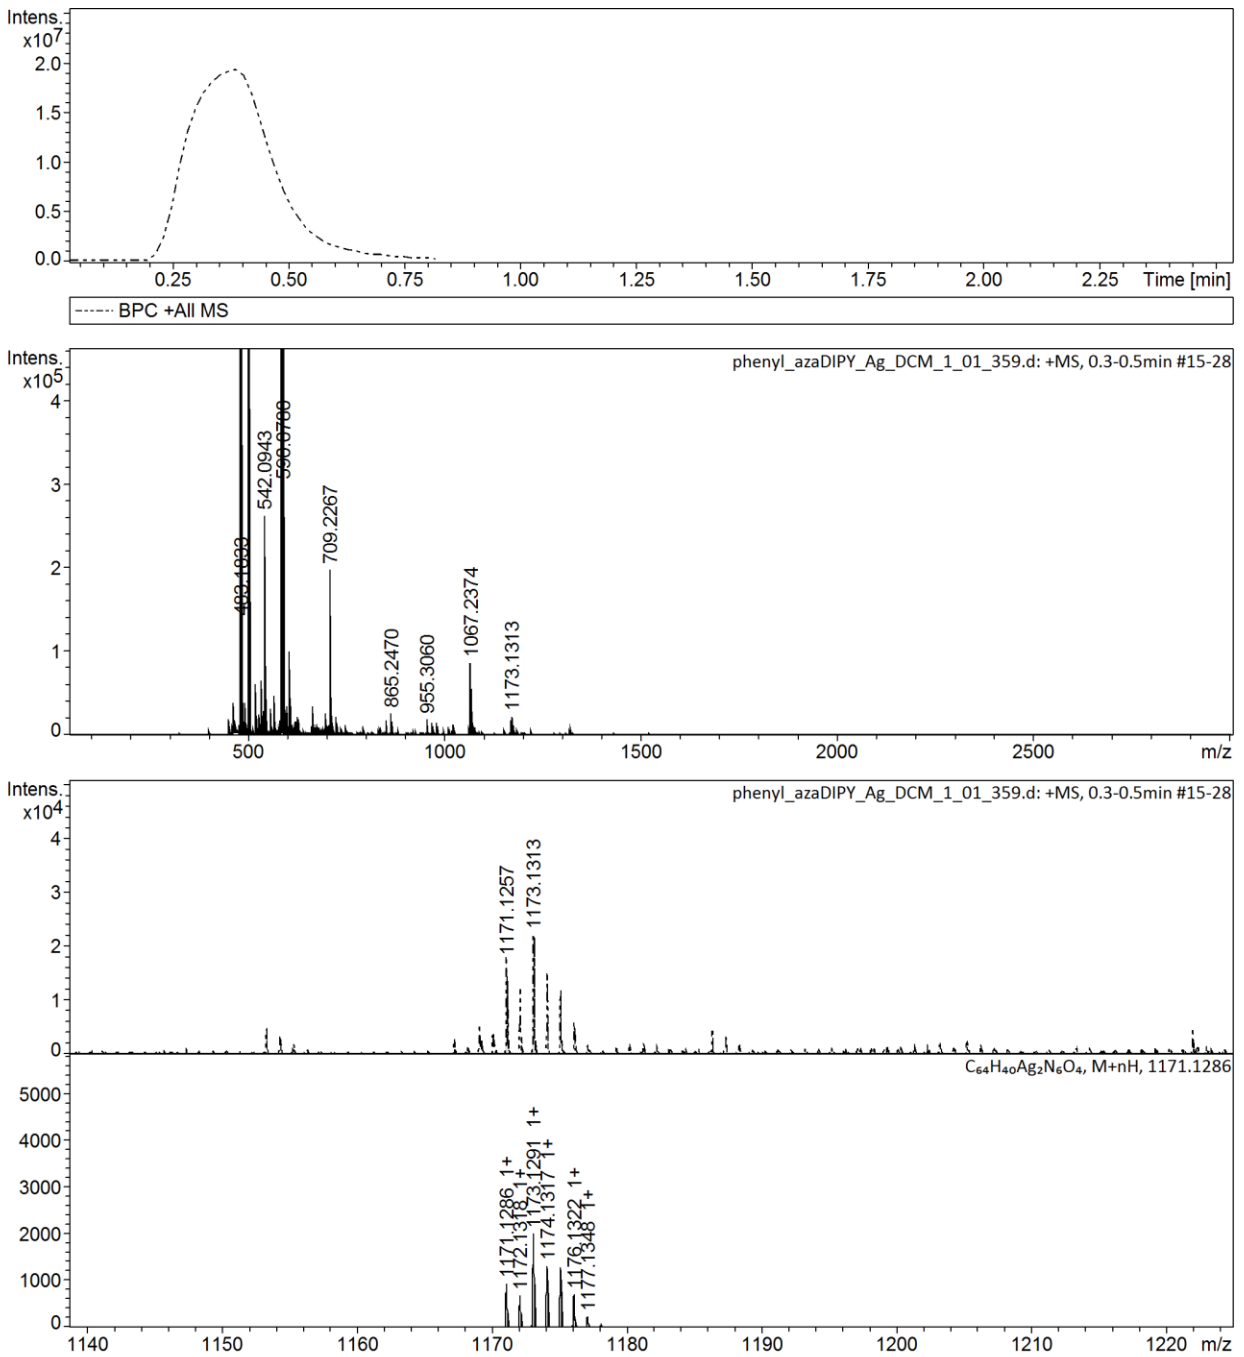

**Figure S4.** APCI high-resolution mass spectrum of compound **2b**



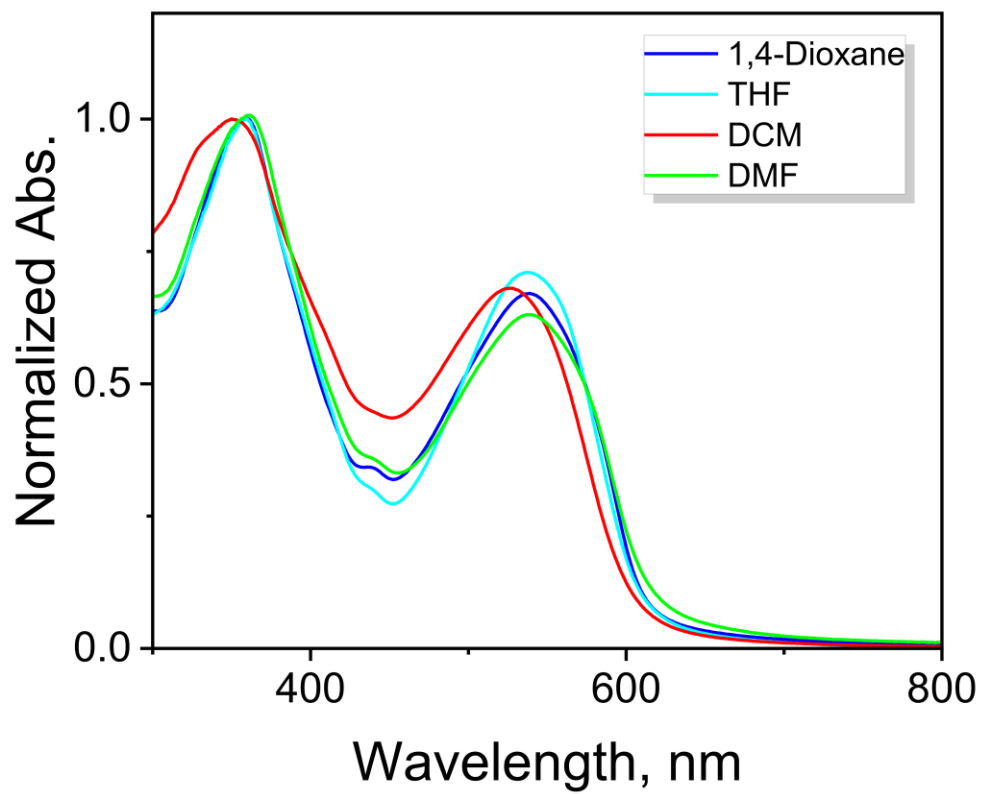

**Figure S5.** Normalized UV-vis absorption spectra of MB-DIPY<sub>2</sub>Ag<sub>2</sub> **2b** in different solvents.

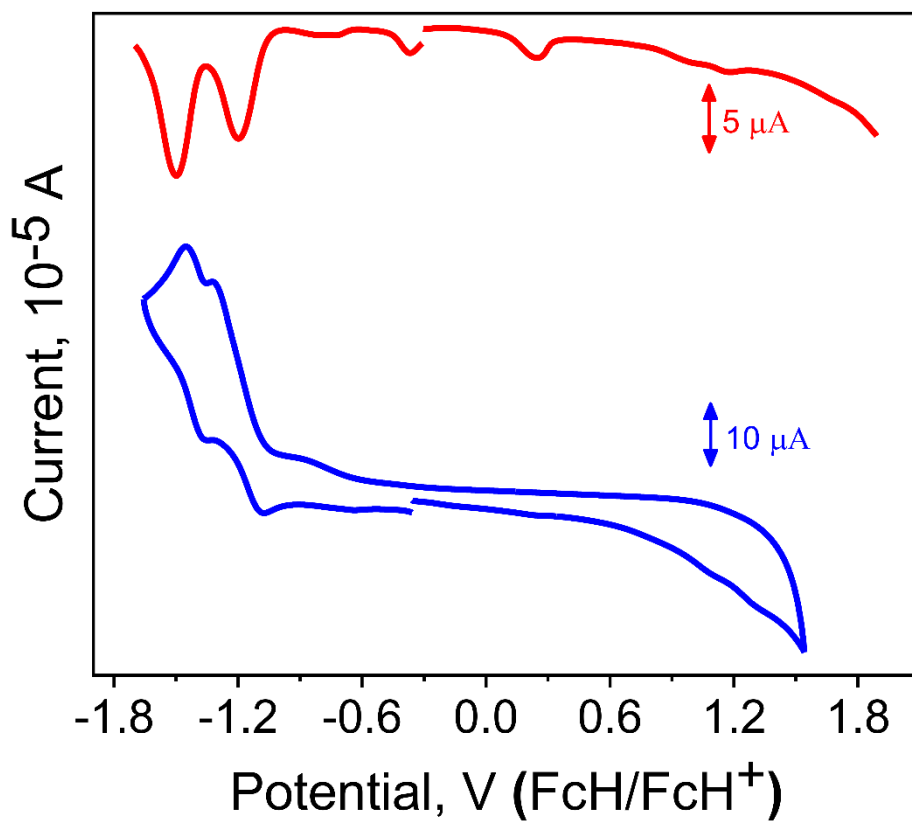

**Figure S6.** CV (bottom) and DPV (top) spectra of MB-DIPY<sub>2</sub>Ag<sub>2</sub> **2a** in the deoxygenated 0.1 M TBAP/DCM system.

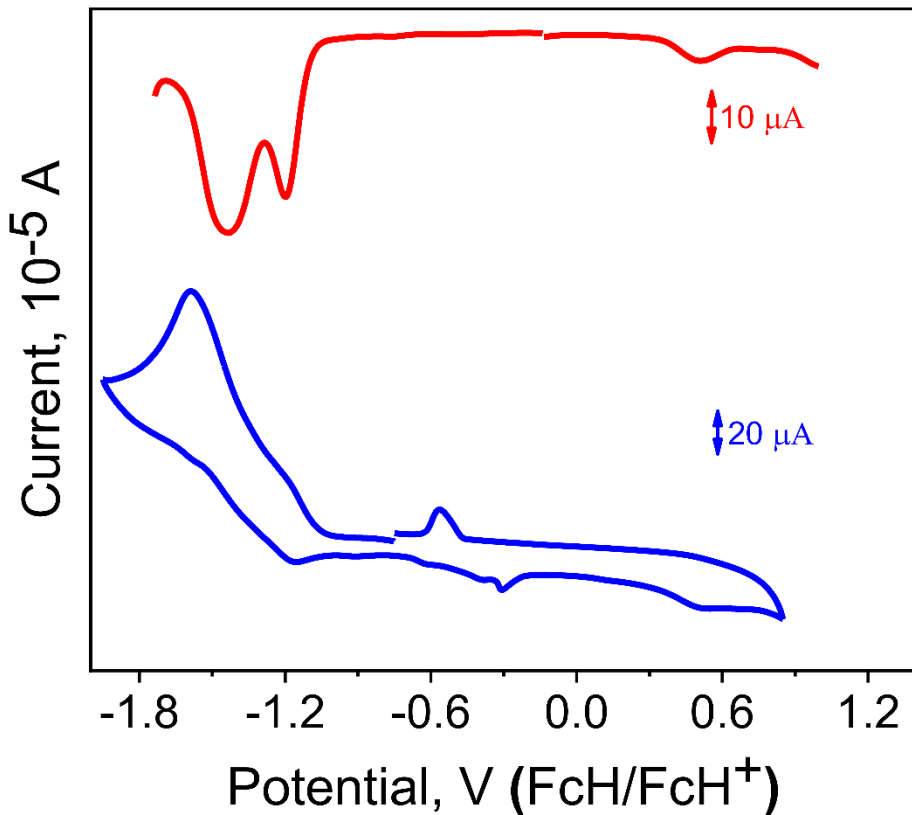

**Figure S7.** CV (bottom) and DPV (top) spectra of MB-DIPY<sub>2</sub>Ag<sub>2</sub> **2b** in the deoxygenated 0.1 M TBAP/DCM system.

**Table S1.** DFT-optimized coordinates of **2a**.

| Center<br>Number | Atomic<br>Number | Atomic<br>Type | Coordinates (Angstroms) |           |           |
|------------------|------------------|----------------|-------------------------|-----------|-----------|
|                  |                  |                | X                       | Y         | Z         |
| 1                | 47               | 0              | 0.025673                | -1.139206 | 0.977277  |
| 2                | 47               | 0              | 0.027841                | 1.132125  | -0.974180 |
| 3                | 6                | 0              | 3.223628                | -1.812842 | 1.728056  |
| 4                | 6                | 0              | 3.520381                | -2.073088 | 0.331605  |
| 5                | 6                | 0              | 2.669218                | -2.126488 | -0.738248 |
| 6                | 6                | 0              | 3.131496                | -2.509227 | -2.096369 |
| 7                | 6                | 0              | 4.375709                | -2.828497 | -2.627539 |
| 8                | 6                | 0              | 4.443210                | -3.173391 | -3.980718 |
| 9                | 6                | 0              | 3.294458                | -3.203741 | -4.778712 |
| 10               | 6                | 0              | 2.044652                | -2.885198 | -4.241813 |
| 11               | 6                | 0              | 1.990436                | -2.538189 | -2.899613 |
| 12               | 6                | 0              | 0.866449                | -2.136926 | -2.028351 |
| 13               | 6                | 0              | -1.465610               | -1.478194 | -2.263112 |
| 14               | 6                | 0              | -2.796824               | -2.062241 | -2.531362 |
| 15               | 6                | 0              | -3.193278               | -3.345646 | -2.878986 |
| 16               | 6                | 0              | -4.559785               | -3.577556 | -3.052910 |
| 17               | 6                | 0              | -5.486522               | -2.542395 | -2.887556 |
| 18               | 6                | 0              | -5.075163               | -1.250761 | -2.545969 |
| 19               | 6                | 0              | -3.715269               | -1.024423 | -2.365571 |
| 20               | 6                | 0              | -2.917606               | 0.182402  | -2.028914 |
| 21               | 6                | 0              | -3.491289               | 1.417707  | -1.883482 |
| 22               | 6                | 0              | -2.847988               | 2.698430  | -1.663827 |
| 23               | 6                | 0              | 3.221441                | 1.817852  | -1.732453 |
| 24               | 6                | 0              | 3.521495                | 2.074955  | -0.336142 |
| 25               | 6                | 0              | 2.672308                | 2.126562  | 0.735433  |
| 26               | 6                | 0              | 3.136787                | 2.507218  | 2.093424  |
| 27               | 6                | 0              | 4.381805                | 2.825959  | 2.623094  |
| 28               | 6                | 0              | 4.451294                | 3.170053  | 3.976342  |
| 29               | 6                | 0              | 3.303665                | 3.200045  | 4.776007  |
| 30               | 6                | 0              | 2.053083                | 2.881967  | 4.240677  |
| 31               | 6                | 0              | 1.996889                | 2.535706  | 2.898371  |
| 32               | 6                | 0              | 0.871454                | 2.135780  | 2.028138  |
| 33               | 6                | 0              | -1.461014               | 1.478580  | 2.264699  |
| 34               | 6                | 0              | -2.791665               | 2.064531  | 2.531558  |
| 35               | 6                | 0              | -3.186707               | 3.348734  | 2.877784  |
| 36               | 6                | 0              | -4.553129               | 3.582612  | 3.050148  |
| 37               | 6                | 0              | -5.481072               | 2.548574  | 2.884711  |
| 38               | 6                | 0              | -5.071123               | 1.256099  | 2.544541  |
| 39               | 6                | 0              | -3.711381               | 1.027823  | 2.365616  |
| 40               | 6                | 0              | -2.914886               | -0.180459 | 2.031389  |
| 41               | 6                | 0              | -3.489715               | -1.415383 | 1.887142  |
| 42               | 6                | 0              | -2.847159               | -2.697469 | 1.673628  |
| 43               | 7                | 0              | 1.304023                | -1.893055 | -0.774607 |
| 44               | 7                | 0              | -0.372349               | -2.171282 | -2.466474 |
| 45               | 7                | 0              | -1.581850               | -0.166961 | -1.947120 |
| 46               | 7                | 0              | 1.307346                | 1.893225  | 0.773550  |
| 47               | 7                | 0              | -0.366758               | 2.170189  | 2.467665  |
| 48               | 7                | 0              | -1.578695               | 0.167175  | 1.950219  |
| 49               | 8                | 0              | 2.091638                | -1.582658 | 2.188096  |

|     |    |   |           |           |           |
|-----|----|---|-----------|-----------|-----------|
| 50  | 8  | 0 | -1.620620 | 2.871563  | -1.559420 |
| 51  | 8  | 0 | 2.087720  | 1.592932  | -2.190990 |
| 52  | 8  | 0 | -1.619221 | -2.873094 | 1.579279  |
| 53  | 1  | 0 | 4.556035  | -2.287314 | 0.102564  |
| 54  | 1  | 0 | 5.277504  | -2.813859 | -2.025330 |
| 55  | 1  | 0 | 5.403323  | -3.422884 | -4.419478 |
| 56  | 1  | 0 | 3.377375  | -3.479070 | -5.824449 |
| 57  | 1  | 0 | 1.147180  | -2.909125 | -4.849583 |
| 58  | 1  | 0 | -2.465781 | -4.138852 | -3.009265 |
| 59  | 1  | 0 | -4.908372 | -4.569101 | -3.320347 |
| 60  | 1  | 0 | -6.542742 | -2.745721 | -3.028145 |
| 61  | 1  | 0 | -5.808442 | -0.460556 | -2.426640 |
| 62  | 1  | 0 | -4.568581 | 1.439043  | -1.983528 |
| 63  | 1  | 0 | 4.557772  | 2.287833  | -0.108736 |
| 64  | 1  | 0 | 5.282782  | 2.811234  | 2.019632  |
| 65  | 1  | 0 | 5.412005  | 3.419469  | 4.413842  |
| 66  | 1  | 0 | 3.388122  | 3.474639  | 5.821808  |
| 67  | 1  | 0 | 1.156472  | 2.905666  | 4.849755  |
| 68  | 1  | 0 | -2.458263 | 4.141015  | 3.008317  |
| 69  | 1  | 0 | -4.900683 | 4.574894  | 3.316221  |
| 70  | 1  | 0 | -6.537149 | 2.753368  | 3.024235  |
| 71  | 1  | 0 | -5.805376 | 0.466835  | 2.425014  |
| 72  | 1  | 0 | -4.567270 | -1.435314 | 1.984581  |
| 73  | 6  | 0 | -3.724293 | -3.881395 | 1.585524  |
| 74  | 6  | 0 | -5.095549 | -4.016677 | 1.640636  |
| 75  | 16 | 0 | -2.959322 | -5.440158 | 1.367660  |
| 76  | 6  | 0 | -5.532853 | -5.358951 | 1.510348  |
| 77  | 1  | 0 | -5.776969 | -3.185691 | 1.767414  |
| 78  | 6  | 0 | -4.490348 | -6.235085 | 1.357356  |
| 79  | 1  | 0 | -6.572208 | -5.662178 | 1.529300  |
| 80  | 1  | 0 | -4.536170 | -7.308105 | 1.238798  |
| 81  | 6  | 0 | 4.357863  | -1.846200 | 2.670616  |
| 82  | 6  | 0 | 5.707993  | -2.055469 | 2.478590  |
| 83  | 16 | 0 | 4.009826  | -1.577949 | 4.364300  |
| 84  | 6  | 0 | 6.459652  | -2.002465 | 3.678872  |
| 85  | 1  | 0 | 6.157030  | -2.240850 | 1.511632  |
| 86  | 6  | 0 | 5.675272  | -1.753881 | 4.775163  |
| 87  | 1  | 0 | 7.532123  | -2.143008 | 3.729039  |
| 88  | 1  | 0 | 5.984674  | -1.664321 | 5.806580  |
| 89  | 6  | 0 | 4.354175  | 1.848090  | -2.676953 |
| 90  | 6  | 0 | 5.705300  | 2.052831  | -2.487145 |
| 91  | 16 | 0 | 4.002320  | 1.582026  | -4.370208 |
| 92  | 6  | 0 | 6.454709  | 1.998124  | -3.688769 |
| 93  | 1  | 0 | 6.156571  | 2.236313  | -1.520866 |
| 94  | 6  | 0 | 5.667652  | 1.752705  | -4.783848 |
| 95  | 1  | 0 | 7.527542  | 2.135232  | -3.740705 |
| 96  | 1  | 0 | 5.975000  | 1.662575  | -5.815828 |
| 97  | 6  | 0 | -3.723688 | 3.883846  | -1.580907 |
| 98  | 6  | 0 | -5.094095 | 4.021877  | -1.648719 |
| 99  | 16 | 0 | -2.957897 | 5.440626  | -1.351973 |
| 100 | 6  | 0 | -5.530120 | 5.364648  | -1.519218 |
| 101 | 1  | 0 | -5.775818 | 3.192561  | -1.784459 |
| 102 | 6  | 0 | -4.487465 | 6.238406  | -1.354140 |
| 103 | 1  | 0 | -6.568677 | 5.669898  | -1.547280 |
| 104 | 1  | 0 | -4.532396 | 7.311197  | -1.233176 |

**Table S2.** DFT-optimized coordinates of **2b**.

| Center Number | Atomic Number | Atomic Type | Coordinates (Angstroms) |           |           |
|---------------|---------------|-------------|-------------------------|-----------|-----------|
|               |               |             | X                       | Y         | Z         |
| 1             | 47            | 0           | -0.082969               | -1.231033 | 0.847571  |
| 2             | 47            | 0           | 0.144226                | 1.170841  | -0.924666 |
| 3             | 6             | 0           | 3.094210                | -2.042463 | 1.592673  |
| 4             | 6             | 0           | 3.393228                | -2.248684 | 0.185926  |
| 5             | 6             | 0           | 2.553002                | -2.210419 | -0.893718 |
| 6             | 6             | 0           | 3.011756                | -2.557886 | -2.262690 |
| 7             | 6             | 0           | 4.243285                | -2.924432 | -2.792811 |
| 8             | 6             | 0           | 4.311480                | -3.207230 | -4.160462 |
| 9             | 6             | 0           | 3.175743                | -3.129350 | -4.973845 |
| 10            | 6             | 0           | 1.938442                | -2.763021 | -4.438015 |
| 11            | 6             | 0           | 1.883609                | -2.480176 | -3.080742 |
| 12            | 6             | 0           | 0.772711                | -2.053503 | -2.205032 |
| 13            | 6             | 0           | -1.500756               | -1.226255 | -2.437819 |
| 14            | 6             | 0           | -2.864999               | -1.682401 | -2.778243 |
| 15            | 6             | 0           | -3.351158               | -2.903389 | -3.223384 |
| 16            | 6             | 0           | -4.725754               | -3.011016 | -3.448494 |
| 17            | 6             | 0           | -5.571919               | -1.917001 | -3.237281 |
| 18            | 6             | 0           | -5.070039               | -0.688394 | -2.797875 |
| 19            | 6             | 0           | -3.702945               | -0.586436 | -2.566359 |
| 20            | 6             | 0           | -2.822851               | 0.528003  | -2.130333 |
| 21            | 6             | 0           | -3.299004               | 1.796570  | -1.922969 |
| 22            | 6             | 0           | -2.554904               | 3.008732  | -1.636385 |
| 23            | 6             | 0           | 3.405540                | 1.783406  | -1.441348 |
| 24            | 6             | 0           | 3.617412                | 1.956158  | -0.015219 |
| 25            | 6             | 0           | 2.705954                | 1.954674  | 1.006389  |
| 26            | 6             | 0           | 3.100375                | 2.211810  | 2.414941  |
| 27            | 6             | 0           | 4.321560                | 2.438943  | 3.038474  |
| 28            | 6             | 0           | 4.321522                | 2.670022  | 4.417446  |
| 29            | 6             | 0           | 3.130168                | 2.679440  | 5.150497  |
| 30            | 6             | 0           | 1.903546                | 2.453087  | 4.521028  |
| 31            | 6             | 0           | 1.916455                | 2.218046  | 3.153862  |
| 32            | 6             | 0           | 0.833427                | 1.929050  | 2.191073  |
| 33            | 6             | 0           | -1.528323               | 1.321423  | 2.297600  |
| 34            | 6             | 0           | -2.853232               | 1.922476  | 2.561818  |
| 35            | 6             | 0           | -3.230647               | 3.195960  | 2.962550  |
| 36            | 6             | 0           | -4.595494               | 3.447369  | 3.122487  |
| 37            | 6             | 0           | -5.539001               | 2.440089  | 2.892516  |
| 38            | 6             | 0           | -5.146598               | 1.157396  | 2.498087  |
| 39            | 6             | 0           | -3.788171               | 0.912392  | 2.331290  |
| 40            | 6             | 0           | -3.008191               | -0.295469 | 1.955667  |
| 41            | 6             | 0           | -3.606486               | -1.512443 | 1.750790  |
| 42            | 6             | 0           | -2.992743               | -2.795179 | 1.469599  |
| 43            | 7             | 0           | 1.203935                | -1.896230 | -0.935950 |
| 44            | 7             | 0           | -0.459154               | -1.989446 | -2.662867 |
| 45            | 7             | 0           | -1.523080               | 0.066512  | -2.035330 |
| 46            | 7             | 0           | 1.334085                | 1.770591  | 0.947659  |
| 47            | 7             | 0           | -0.427489               | 1.976493  | 2.558789  |
| 48            | 7             | 0           | -1.665594               | 0.027064  | 1.917228  |
| 49            | 8             | 0           | 1.957577                | -1.837424 | 2.041744  |

|     |   |   |           |           |           |
|-----|---|---|-----------|-----------|-----------|
| 50  | 8 | 0 | -1.318096 | 3.063702  | -1.559454 |
| 51  | 8 | 0 | 2.311683  | 1.521833  | -1.962396 |
| 52  | 8 | 0 | -1.780498 | -2.963351 | 1.265662  |
| 53  | 1 | 0 | 4.413045  | -2.527180 | -0.043329 |
| 54  | 1 | 0 | 5.134849  | -2.991993 | -2.178915 |
| 55  | 1 | 0 | 5.261797  | -3.493183 | -4.598490 |
| 56  | 1 | 0 | 3.258701  | -3.358120 | -6.030849 |
| 57  | 1 | 0 | 1.050816  | -2.703540 | -5.057863 |
| 58  | 1 | 0 | -2.685432 | -3.742817 | -3.390390 |
| 59  | 1 | 0 | -5.143538 | -3.951094 | -3.792281 |
| 60  | 1 | 0 | -6.636086 | -2.023811 | -3.418971 |
| 61  | 1 | 0 | -5.741300 | 0.149755  | -2.644717 |
| 62  | 1 | 0 | -4.365369 | 1.913195  | -2.062347 |
| 63  | 1 | 0 | 4.643328  | 2.106751  | 0.293222  |
| 64  | 1 | 0 | 5.256100  | 2.436557  | 2.488070  |
| 65  | 1 | 0 | 5.262420  | 2.845275  | 4.928013  |
| 66  | 1 | 0 | 3.161521  | 2.864772  | 6.218716  |
| 67  | 1 | 0 | 0.973747  | 2.460893  | 5.078765  |
| 68  | 1 | 0 | -2.490732 | 3.967673  | 3.143129  |
| 69  | 1 | 0 | -4.929432 | 4.432442  | 3.429904  |
| 70  | 1 | 0 | -6.593528 | 2.657691  | 3.025011  |
| 71  | 1 | 0 | -5.892829 | 0.388365  | 2.329974  |
| 72  | 1 | 0 | -4.685976 | -1.508060 | 1.820509  |
| 73  | 6 | 0 | 4.234317  | -2.135187 | 2.568455  |
| 74  | 6 | 0 | 5.574310  | -1.926207 | 2.210322  |
| 75  | 6 | 0 | 3.930771  | -2.413579 | 3.909388  |
| 76  | 6 | 0 | 6.582490  | -1.998858 | 3.168743  |
| 77  | 1 | 0 | 5.840282  | -1.677184 | 1.189870  |
| 78  | 6 | 0 | 4.938475  | -2.502382 | 4.862298  |
| 79  | 1 | 0 | 2.894207  | -2.561269 | 4.186975  |
| 80  | 6 | 0 | 6.268881  | -2.294599 | 4.494292  |
| 81  | 1 | 0 | 7.613220  | -1.823524 | 2.879078  |
| 82  | 1 | 0 | 4.688745  | -2.731381 | 5.893007  |
| 83  | 1 | 0 | 7.056317  | -2.359564 | 5.238008  |
| 84  | 6 | 0 | -3.890260 | -4.001331 | 1.408232  |
| 85  | 6 | 0 | -3.439281 | -5.120848 | 0.693508  |
| 86  | 6 | 0 | -5.129405 | -4.073902 | 2.060884  |
| 87  | 6 | 0 | -4.213271 | -6.272680 | 0.613875  |
| 88  | 1 | 0 | -2.475809 | -5.067981 | 0.201280  |
| 89  | 6 | 0 | -5.897643 | -5.234094 | 1.994869  |
| 90  | 1 | 0 | -5.491109 | -3.239783 | 2.650497  |
| 91  | 6 | 0 | -5.446018 | -6.333000 | 1.266013  |
| 92  | 1 | 0 | -3.856020 | -7.125661 | 0.046291  |
| 93  | 1 | 0 | -6.848052 | -5.279876 | 2.516179  |
| 94  | 1 | 0 | -6.048833 | -7.233505 | 1.209801  |
| 95  | 6 | 0 | -3.332791 | 4.286807  | -1.478269 |
| 96  | 6 | 0 | -2.657170 | 5.498288  | -1.687179 |
| 97  | 6 | 0 | -4.684004 | 4.325606  | -1.104953 |
| 98  | 6 | 0 | -3.316934 | 6.713736  | -1.548108 |
| 99  | 1 | 0 | -1.610295 | 5.467528  | -1.964017 |
| 100 | 6 | 0 | -5.341019 | 5.544127  | -0.949721 |
| 101 | 1 | 0 | -5.226033 | 3.409575  | -0.902539 |
| 102 | 6 | 0 | -4.662637 | 6.740194  | -1.178052 |
| 103 | 1 | 0 | -2.783459 | 7.641652  | -1.726153 |
| 104 | 1 | 0 | -6.383128 | 5.558235  | -0.648224 |
| 105 | 1 | 0 | -5.178094 | 7.688315  | -1.064772 |

|     |   |   |          |          |           |
|-----|---|---|----------|----------|-----------|
| 106 | 6 | 0 | 4.601791 | 1.908687 | -2.343562 |
| 107 | 6 | 0 | 5.746166 | 2.646889 | -2.007950 |
| 108 | 6 | 0 | 4.546830 | 1.282652 | -3.597886 |
| 109 | 6 | 0 | 6.807984 | 2.751946 | -2.903400 |
| 110 | 1 | 0 | 5.806063 | 3.171651 | -1.061777 |
| 111 | 6 | 0 | 5.614025 | 1.372825 | -4.483718 |
| 112 | 1 | 0 | 3.657492 | 0.723102 | -3.860845 |
| 113 | 6 | 0 | 6.748589 | 2.109454 | -4.138951 |
| 114 | 1 | 0 | 7.680592 | 3.338498 | -2.636011 |
| 115 | 1 | 0 | 5.562033 | 0.871296 | -5.444365 |
| 116 | 1 | 0 | 7.579973 | 2.185742 | -4.832041 |

---

**Table S3.** Crystal data and structure refinement for **2a**.

|                                   |                                                                                              |                 |
|-----------------------------------|----------------------------------------------------------------------------------------------|-----------------|
| Identification code               | <b>2a</b>                                                                                    |                 |
| Empirical formula                 | C <sub>57</sub> H <sub>36</sub> Ag <sub>2</sub> N <sub>6</sub> O <sub>5</sub> S <sub>4</sub> |                 |
| Formula weight                    | 1228.90                                                                                      |                 |
| Temperature                       | 150(2) K                                                                                     |                 |
| Wavelength                        | 0.71073 Å                                                                                    |                 |
| Crystal system                    | Triclinic                                                                                    |                 |
| Space group                       | P-1                                                                                          |                 |
| Unit cell dimensions              | a = 11.2065(8) Å                                                                             | a = 69.848(3)°. |
|                                   | b = 14.1626(10) Å                                                                            | b = 85.511(3)°. |
|                                   | c = 16.1136(11) Å                                                                            | g = 87.425(3)°. |
| Volume                            | 2393.1(3) Å <sup>3</sup>                                                                     |                 |
| Z                                 | 2                                                                                            |                 |
| Density (calculated)              | 1.705 Mg/m <sup>3</sup>                                                                      |                 |
| Absorption coefficient            | 1.054 mm <sup>-1</sup>                                                                       |                 |
| F(000)                            | 1236                                                                                         |                 |
| Crystal size                      | 0.082 x 0.055 x 0.032 mm <sup>3</sup>                                                        |                 |
| Theta range for data collection   | 2.340 to 27.590°.                                                                            |                 |
| Index ranges                      | -14 ≤ h ≤ 14, -18 ≤ k ≤ 18, -20 ≤ l ≤ 20                                                     |                 |
| Reflections collected             | 65682                                                                                        |                 |
| Independent reflections           | 11041 [R(int) = 0.1058]                                                                      |                 |
| Completeness to theta = 25.242°   | 99.9 %                                                                                       |                 |
| Absorption correction             | Semi-empirical from equivalents                                                              |                 |
| Max. and min. transmission        | 0.7456 and 0.6678                                                                            |                 |
| Refinement method                 | Full-matrix least-squares on F <sup>2</sup>                                                  |                 |
| Data / restraints / parameters    | 11041 / 0 / 671                                                                              |                 |
| Goodness-of-fit on F <sup>2</sup> | 1.028                                                                                        |                 |

|                                      |                                    |
|--------------------------------------|------------------------------------|
| Final R indices [ $I > 2\sigma(I)$ ] | R1 = 0.0554, wR2 = 0.1286          |
| R indices (all data)                 | R1 = 0.1032, wR2 = 0.1482          |
| Extinction coefficient               | n/a                                |
| Largest diff. peak and hole          | 2.176 and -1.057 e.Å <sup>-3</sup> |

**Table S4.** Atomic coordinates ( $\times 10^4$ ) and equivalent isotropic displacement parameters ( $\text{Å}^2 \times 10^3$ ) for **2a**.  $U(\text{eq})$  is defined as one third of the trace of the orthogonalized  $U_{ij}$  tensor.

|       | x       | y       | z       | U(eq) |
|-------|---------|---------|---------|-------|
| Ag(1) | 3078(1) | 2340(1) | 3789(1) | 22(1) |
| Ag(2) | 4802(1) | 3939(1) | 3080(1) | 23(1) |
| C(1)  | 2618(6) | 1168(5) | 8275(4) | 30(1) |
| C(2)  | 3771(6) | 835(5)  | 8350(4) | 39(2) |
| S(1A) | 2217(1) | 1569(1) | 7224(1) | 31(1) |
| C(3A) | 4408(6) | 900(4)  | 7525(3) | 51(2) |
| C(3B) | 2217(1) | 1569(1) | 7224(1) | 31(1) |
| S(1B) | 4408(6) | 900(4)  | 7525(3) | 51(2) |
| C(4)  | 3597(5) | 1277(4) | 6833(4) | 21(1) |
| C(5)  | 3798(5) | 1447(4) | 5890(3) | 20(1) |
| C(6)  | 4956(5) | 1113(4) | 5600(3) | 20(1) |
| C(7)  | 5387(4) | 1196(4) | 4770(3) | 17(1) |
| C(8)  | 6594(4) | 805(4)  | 4591(3) | 18(1) |
| C(9)  | 7470(5) | 282(4)  | 5138(4) | 22(1) |
| C(10) | 8491(5) | -13(4)  | 4745(4) | 27(1) |
| C(11) | 8649(5) | 231(4)  | 3829(4) | 27(1) |
| C(12) | 7772(5) | 755(4)  | 3283(4) | 23(1) |
| C(13) | 6735(5) | 1028(4) | 3679(4) | 21(1) |
| C(14) | 5615(5) | 1533(4) | 3325(3) | 19(1) |
| C(15) | 4775(4) | 2495(4) | 1952(3) | 19(1) |
| C(16) | 4174(5) | 2378(4) | 1209(3) | 19(1) |
| C(17) | 4015(5) | 1546(4) | 970(4)  | 27(1) |
| C(18) | 3382(5) | 1687(4) | 236(4)  | 28(1) |
| C(19) | 2941(6) | 2623(4) | -252(4) | 30(1) |
| C(20) | 3098(5) | 3456(4) | -8(4)   | 26(1) |
| C(21) | 3720(4) | 3314(4) | 735(3)  | 18(1) |
| C(22) | 4068(4) | 4010(4) | 1181(3) | 18(1) |
| C(23) | 3800(5) | 5010(4) | 878(4)  | 22(1) |
| C(24) | 4102(5) | 5759(4) | 1241(4) | 25(1) |



|        |          |         |         |       |
|--------|----------|---------|---------|-------|
| C(25)  | 3655(5)  | 6795(4) | 809(4)  | 30(1) |
| C(26)  | 3121(5)  | 7235(4) | 5(4)    | 31(1) |
| C(27)  | 2872(6)  | 8264(5) | -155(6) | 49(2) |
| C(28)  | 3187(7)  | 8572(5) | 496(6)  | 58(2) |
| C(29)  | 10007(5) | 2465(5) | 5168(5) | 35(2) |
| C(30)  | 9460(6)  | 2466(6) | 5947(5) | 49(2) |
| C(31)  | 8223(5)  | 2717(5) | 5900(4) | 35(2) |
| C(32)  | 7859(5)  | 2931(4) | 5056(4) | 20(1) |
| C(33)  | 6698(4)  | 3278(4) | 4693(4) | 19(1) |
| C(34)  | 5748(5)  | 3476(4) | 5294(3) | 19(1) |
| C(35)  | 4623(5)  | 3808(4) | 5136(3) | 19(1) |
| C(36)  | 3755(5)  | 3986(4) | 5816(4) | 20(1) |
| C(37)  | 3873(5)  | 3928(4) | 6676(4) | 24(1) |
| C(38)  | 2876(5)  | 4195(4) | 7127(4) | 27(1) |
| C(39)  | 1818(5)  | 4508(4) | 6722(4) | 30(1) |
| C(40)  | 1700(5)  | 4573(4) | 5850(4) | 26(1) |
| C(41)  | 2699(5)  | 4317(4) | 5402(4) | 21(1) |
| C(42)  | 2929(5)  | 4348(4) | 4491(4) | 20(1) |
| C(43)  | 1835(4)  | 4509(4) | 3210(4) | 20(1) |
| C(44)  | 1251(4)  | 5237(4) | 2452(4) | 20(1) |
| C(45)  | 1014(5)  | 6258(4) | 2221(4) | 27(1) |
| C(46)  | 422(5)   | 6730(4) | 1456(4) | 34(2) |
| C(47)  | 79(5)    | 6193(4) | 938(4)  | 33(1) |
| C(48)  | 320(5)   | 5177(4) | 1174(4) | 28(1) |
| C(49)  | 923(5)   | 4704(4) | 1937(3) | 20(1) |
| C(50)  | 1306(5)  | 3644(4) | 2382(3) | 20(1) |
| C(51)  | 1078(5)  | 2894(4) | 2065(4) | 22(1) |
| C(52)  | 1328(5)  | 1848(4) | 2427(4) | 25(1) |
| C(53)  | 975(5)   | 1191(4) | 1935(4) | 26(1) |
| C(54A) | 178(4)   | 1452(4) | 1184(3) | 42(2) |
| S(4A)  | 1509(2)  | -10(1)  | 2262(2) | 40(1) |
| S(4B)  | 178(4)   | 1452(4) | 1184(3) | 42(2) |
| C(54B) | 1509(2)  | -10(1)  | 2262(2) | 40(1) |
| C(55)  | 158(7)   | 527(6)  | 979(5)  | 48(2) |
| C(56)  | 802(6)   | -264(6) | 1500(6) | 50(2) |
| C(57)  | 2162(6)  | 6497(6) | 8047(5) | 46(2) |
| N(1)   | 4846(4)  | 1614(3) | 3979(3) | 18(1) |
| N(2)   | 5380(4)  | 1753(3) | 2482(3) | 24(1) |
| N(3)   | 4692(4)  | 3464(3) | 1920(3) | 20(1) |
| N(4)   | 4057(4)  | 4060(3) | 4334(3) | 19(1) |

|      |         |         |         |       |
|------|---------|---------|---------|-------|
| N(5) | 2156(4) | 4774(3) | 3852(3) | 25(1) |
| N(6) | 1858(4) | 3577(3) | 3138(3) | 18(1) |
| O(5) | 2779(4) | 5793(4) | 8673(3) | 50(1) |
| O(1) | 2991(3) | 1850(3) | 5402(2) | 25(1) |
| O(2) | 4717(5) | 5592(3) | 1880(3) | 42(1) |
| O(3) | 6570(3) | 3390(3) | 3917(2) | 26(1) |
| O(4) | 1825(4) | 1424(3) | 3131(3) | 38(1) |
| S(2) | 3809(2) | 7648(1) | 1330(1) | 50(1) |
| S(3) | 9033(1) | 2792(1) | 4350(1) | 33(1) |

---

**Table S5.** Bond lengths [ $\text{\AA}$ ] and angles [ $^\circ$ ] for **2a**.

---

|              |           |
|--------------|-----------|
| Ag(1)-N(1)   | 2.184(4)  |
| Ag(1)-N(6)   | 2.187(4)  |
| Ag(1)-O(1)   | 2.443(4)  |
| Ag(1)-O(4)   | 2.473(4)  |
| Ag(1)-Ag(2)  | 2.9043(6) |
| Ag(2)-N(4)   | 2.184(4)  |
| Ag(2)-N(3)   | 2.208(4)  |
| Ag(2)-O(3)   | 2.430(4)  |
| Ag(2)-O(2)   | 2.473(4)  |
| C(1)-C(2)    | 1.356(9)  |
| C(1)-C(3B)   | 1.681(6)  |
| C(1)-S(1A)   | 1.681(6)  |
| C(1)-H(1)    | 0.9500    |
| C(2)-S(1B)   | 1.434(8)  |
| C(2)-C(3A)   | 1.434(8)  |
| C(2)-H(2)    | 0.9500    |
| S(1A)-C(4)   | 1.712(6)  |
| C(3A)-C(4)   | 1.434(8)  |
| C(3A)-H(3AA) | 0.9500    |
| C(3B)-C(4)   | 1.712(6)  |
| C(3B)-H(3BA) | 0.9500    |
| S(1B)-C(4)   | 1.434(8)  |
| C(4)-C(5)    | 1.455(7)  |
| C(5)-O(1)    | 1.232(6)  |
| C(5)-C(6)    | 1.459(7)  |

|             |          |
|-------------|----------|
| C(6)-C(7)   | 1.354(7) |
| C(6)-H(6)   | 0.9500   |
| C(7)-N(1)   | 1.383(6) |
| C(7)-C(8)   | 1.484(7) |
| C(8)-C(9)   | 1.381(7) |
| C(8)-C(13)  | 1.390(7) |
| C(9)-C(10)  | 1.382(8) |
| C(9)-H(9)   | 0.9500   |
| C(10)-C(11) | 1.393(8) |
| C(10)-H(10) | 0.9500   |
| C(11)-C(12) | 1.383(8) |
| C(11)-H(11) | 0.9500   |
| C(12)-C(13) | 1.386(7) |
| C(12)-H(12) | 0.9500   |
| C(13)-C(14) | 1.470(7) |
| C(14)-N(2)  | 1.329(7) |
| C(14)-N(1)  | 1.342(7) |
| C(15)-N(2)  | 1.305(7) |
| C(15)-N(3)  | 1.354(7) |
| C(15)-C(16) | 1.479(7) |
| C(16)-C(21) | 1.380(7) |
| C(16)-C(17) | 1.381(7) |
| C(17)-C(18) | 1.378(8) |
| C(17)-H(17) | 0.9500   |
| C(18)-C(19) | 1.380(8) |
| C(18)-H(18) | 0.9500   |
| C(19)-C(20) | 1.388(8) |
| C(19)-H(19) | 0.9500   |
| C(20)-C(21) | 1.383(7) |
| C(20)-H(20) | 0.9500   |
| C(21)-C(22) | 1.486(7) |
| C(22)-C(23) | 1.357(7) |
| C(22)-N(3)  | 1.397(6) |
| C(23)-C(24) | 1.440(7) |
| C(23)-H(23) | 0.9500   |
| C(24)-O(2)  | 1.233(7) |
| C(24)-C(25) | 1.474(8) |
| C(25)-C(26) | 1.399(9) |
| C(25)-S(2)  | 1.713(6) |
| C(26)-C(27) | 1.409(9) |

|             |           |
|-------------|-----------|
| C(26)-H(26) | 0.9500    |
| C(27)-C(28) | 1.343(12) |
| C(27)-H(27) | 0.9500    |
| C(28)-S(2)  | 1.689(9)  |
| C(28)-H(28) | 0.9500    |
| C(29)-C(30) | 1.353(10) |
| C(29)-S(3)  | 1.704(6)  |
| C(29)-H(29) | 0.9500    |
| C(30)-C(31) | 1.417(8)  |
| C(30)-H(30) | 0.9500    |
| C(31)-C(32) | 1.379(8)  |
| C(31)-H(31) | 0.9500    |
| C(32)-C(33) | 1.463(7)  |
| C(32)-S(3)  | 1.719(5)  |
| C(33)-O(3)  | 1.224(6)  |
| C(33)-C(34) | 1.466(7)  |
| C(34)-C(35) | 1.338(7)  |
| C(34)-H(34) | 0.9500    |
| C(35)-N(4)  | 1.411(7)  |
| C(35)-C(36) | 1.487(7)  |
| C(36)-C(37) | 1.377(7)  |
| C(36)-C(41) | 1.386(7)  |
| C(37)-C(38) | 1.394(8)  |
| C(37)-H(37) | 0.9500    |
| C(38)-C(39) | 1.379(8)  |
| C(38)-H(38) | 0.9500    |
| C(39)-C(40) | 1.392(8)  |
| C(39)-H(39) | 0.9500    |
| C(40)-C(41) | 1.386(8)  |
| C(40)-H(40) | 0.9500    |
| C(41)-C(42) | 1.456(7)  |
| C(42)-N(4)  | 1.342(7)  |
| C(42)-N(5)  | 1.356(7)  |
| C(43)-N(5)  | 1.296(7)  |
| C(43)-N(6)  | 1.363(7)  |
| C(43)-C(44) | 1.476(7)  |
| C(44)-C(49) | 1.378(7)  |
| C(44)-C(45) | 1.382(7)  |
| C(45)-C(46) | 1.389(9)  |
| C(45)-H(45) | 0.9500    |

|               |           |
|---------------|-----------|
| C(46)-C(47)   | 1.391(9)  |
| C(46)-H(46)   | 0.9500    |
| C(47)-C(48)   | 1.376(8)  |
| C(47)-H(47)   | 0.9500    |
| C(48)-C(49)   | 1.393(7)  |
| C(48)-H(48)   | 0.9500    |
| C(49)-C(50)   | 1.483(7)  |
| C(50)-C(51)   | 1.370(7)  |
| C(50)-N(6)    | 1.381(6)  |
| C(51)-C(52)   | 1.415(8)  |
| C(51)-H(51)   | 0.9500    |
| C(52)-O(4)    | 1.248(7)  |
| C(52)-C(53)   | 1.498(8)  |
| C(53)-S(4B)   | 1.494(7)  |
| C(53)-C(54A)  | 1.494(7)  |
| C(53)-C(54B)  | 1.694(6)  |
| C(53)-S(4A)   | 1.694(6)  |
| C(54A)-C(55)  | 1.459(8)  |
| C(54A)-H(54A) | 0.9500    |
| S(4A)-C(56)   | 1.657(8)  |
| S(4B)-C(55)   | 1.459(8)  |
| C(54B)-C(56)  | 1.657(8)  |
| C(54B)-H(54B) | 0.9500    |
| C(55)-C(56)   | 1.362(11) |
| C(55)-H(55)   | 0.9500    |
| C(56)-H(56)   | 0.9500    |
| C(57)-O(5)    | 1.359(8)  |
| C(57)-H(57A)  | 0.9800    |
| C(57)-H(57B)  | 0.9800    |
| C(57)-H(57C)  | 0.9800    |
| O(5)-H(5)     | 0.8400    |

|                  |            |
|------------------|------------|
| N(1)-Ag(1)-N(6)  | 152.90(16) |
| N(1)-Ag(1)-O(1)  | 82.82(14)  |
| N(6)-Ag(1)-O(1)  | 114.58(14) |
| N(1)-Ag(1)-O(4)  | 109.29(15) |
| N(6)-Ag(1)-O(4)  | 81.64(15)  |
| O(1)-Ag(1)-O(4)  | 118.18(14) |
| N(1)-Ag(1)-Ag(2) | 73.78(11)  |
| N(6)-Ag(1)-Ag(2) | 81.00(11)  |

|                   |            |
|-------------------|------------|
| O(1)-Ag(1)-Ag(2)  | 107.14(9)  |
| O(4)-Ag(1)-Ag(2)  | 134.66(11) |
| N(4)-Ag(2)-N(3)   | 151.58(16) |
| N(4)-Ag(2)-O(3)   | 81.95(14)  |
| N(3)-Ag(2)-O(3)   | 116.69(14) |
| N(4)-Ag(2)-O(2)   | 110.50(16) |
| N(3)-Ag(2)-O(2)   | 79.30(15)  |
| O(3)-Ag(2)-O(2)   | 121.15(14) |
| N(4)-Ag(2)-Ag(1)  | 74.32(11)  |
| N(3)-Ag(2)-Ag(1)  | 79.51(12)  |
| O(3)-Ag(2)-Ag(1)  | 106.85(10) |
| O(2)-Ag(2)-Ag(1)  | 132.00(11) |
| C(2)-C(1)-C(3B)   | 112.9(5)   |
| C(2)-C(1)-S(1A)   | 112.9(5)   |
| C(2)-C(1)-H(1)    | 123.6      |
| S(1A)-C(1)-H(1)   | 123.6      |
| C(1)-C(2)-S(1B)   | 114.3(6)   |
| C(1)-C(2)-C(3A)   | 114.3(6)   |
| C(1)-C(2)-H(2)    | 122.8      |
| C(3A)-C(2)-H(2)   | 122.8      |
| C(1)-S(1A)-C(4)   | 92.4(3)    |
| C(4)-C(3A)-C(2)   | 108.4(5)   |
| C(4)-C(3A)-H(3AA) | 125.8      |
| C(2)-C(3A)-H(3AA) | 125.8      |
| C(1)-C(3B)-C(4)   | 92.4(3)    |
| C(1)-C(3B)-H(3BA) | 133.8      |
| C(4)-C(3B)-H(3BA) | 133.8      |
| C(4)-S(1B)-C(2)   | 108.4(5)   |
| S(1B)-C(4)-C(5)   | 129.6(5)   |
| C(3A)-C(4)-C(5)   | 129.6(5)   |
| S(1B)-C(4)-C(3B)  | 111.9(4)   |
| C(5)-C(4)-C(3B)   | 118.5(4)   |
| C(3A)-C(4)-S(1A)  | 111.9(4)   |
| C(5)-C(4)-S(1A)   | 118.5(4)   |
| O(1)-C(5)-C(4)    | 118.5(5)   |
| O(1)-C(5)-C(6)    | 125.1(5)   |
| C(4)-C(5)-C(6)    | 116.4(5)   |
| C(7)-C(6)-C(5)    | 128.8(5)   |
| C(7)-C(6)-H(6)    | 115.6      |
| C(5)-C(6)-H(6)    | 115.6      |

|                   |          |
|-------------------|----------|
| C(6)-C(7)-N(1)    | 129.2(5) |
| C(6)-C(7)-C(8)    | 121.9(5) |
| N(1)-C(7)-C(8)    | 109.0(4) |
| C(9)-C(8)-C(13)   | 121.3(5) |
| C(9)-C(8)-C(7)    | 132.7(5) |
| C(13)-C(8)-C(7)   | 106.0(4) |
| C(8)-C(9)-C(10)   | 117.5(5) |
| C(8)-C(9)-H(9)    | 121.2    |
| C(10)-C(9)-H(9)   | 121.2    |
| C(9)-C(10)-C(11)  | 121.4(5) |
| C(9)-C(10)-H(10)  | 119.3    |
| C(11)-C(10)-H(10) | 119.3    |
| C(12)-C(11)-C(10) | 121.0(5) |
| C(12)-C(11)-H(11) | 119.5    |
| C(10)-C(11)-H(11) | 119.5    |
| C(11)-C(12)-C(13) | 117.6(5) |
| C(11)-C(12)-H(12) | 121.2    |
| C(13)-C(12)-H(12) | 121.2    |
| C(12)-C(13)-C(8)  | 121.2(5) |
| C(12)-C(13)-C(14) | 132.7(5) |
| C(8)-C(13)-C(14)  | 106.1(4) |
| N(2)-C(14)-N(1)   | 126.1(5) |
| N(2)-C(14)-C(13)  | 122.6(5) |
| N(1)-C(14)-C(13)  | 110.8(4) |
| N(2)-C(15)-N(3)   | 128.1(5) |
| N(2)-C(15)-C(16)  | 121.3(5) |
| N(3)-C(15)-C(16)  | 110.3(4) |
| C(21)-C(16)-C(17) | 121.7(5) |
| C(21)-C(16)-C(15) | 106.6(4) |
| C(17)-C(16)-C(15) | 131.6(5) |
| C(18)-C(17)-C(16) | 117.3(5) |
| C(18)-C(17)-H(17) | 121.3    |
| C(16)-C(17)-H(17) | 121.3    |
| C(17)-C(18)-C(19) | 121.5(5) |
| C(17)-C(18)-H(18) | 119.2    |
| C(19)-C(18)-H(18) | 119.2    |
| C(18)-C(19)-C(20) | 121.0(5) |
| C(18)-C(19)-H(19) | 119.5    |
| C(20)-C(19)-H(19) | 119.5    |
| C(21)-C(20)-C(19) | 117.6(5) |

|                   |          |
|-------------------|----------|
| C(21)-C(20)-H(20) | 121.2    |
| C(19)-C(20)-H(20) | 121.2    |
| C(16)-C(21)-C(20) | 120.8(5) |
| C(16)-C(21)-C(22) | 106.4(4) |
| C(20)-C(21)-C(22) | 132.8(5) |
| C(23)-C(22)-N(3)  | 128.4(5) |
| C(23)-C(22)-C(21) | 122.7(5) |
| N(3)-C(22)-C(21)  | 108.9(4) |
| C(22)-C(23)-C(24) | 127.9(5) |
| C(22)-C(23)-H(23) | 116.0    |
| C(24)-C(23)-H(23) | 116.0    |
| O(2)-C(24)-C(23)  | 124.3(5) |
| O(2)-C(24)-C(25)  | 118.2(5) |
| C(23)-C(24)-C(25) | 117.5(5) |
| C(26)-C(25)-C(24) | 130.6(5) |
| C(26)-C(25)-S(2)  | 111.6(4) |
| C(24)-C(25)-S(2)  | 117.8(5) |
| C(25)-C(26)-C(27) | 110.7(6) |
| C(25)-C(26)-H(26) | 124.7    |
| C(27)-C(26)-H(26) | 124.7    |
| C(28)-C(27)-C(26) | 113.1(7) |
| C(28)-C(27)-H(27) | 123.4    |
| C(26)-C(27)-H(27) | 123.4    |
| C(27)-C(28)-S(2)  | 113.4(5) |
| C(27)-C(28)-H(28) | 123.3    |
| S(2)-C(28)-H(28)  | 123.3    |
| C(30)-C(29)-S(3)  | 111.4(5) |
| C(30)-C(29)-H(29) | 124.3    |
| S(3)-C(29)-H(29)  | 124.3    |
| C(29)-C(30)-C(31) | 113.6(6) |
| C(29)-C(30)-H(30) | 123.2    |
| C(31)-C(30)-H(30) | 123.2    |
| C(32)-C(31)-C(30) | 111.8(6) |
| C(32)-C(31)-H(31) | 124.1    |
| C(30)-C(31)-H(31) | 124.1    |
| C(31)-C(32)-C(33) | 130.7(5) |
| C(31)-C(32)-S(3)  | 110.8(4) |
| C(33)-C(32)-S(3)  | 118.5(4) |
| O(3)-C(33)-C(32)  | 119.2(5) |
| O(3)-C(33)-C(34)  | 123.8(5) |



|                   |          |
|-------------------|----------|
| C(32)-C(33)-C(34) | 117.0(5) |
| C(35)-C(34)-C(33) | 129.5(5) |
| C(35)-C(34)-H(34) | 115.3    |
| C(33)-C(34)-H(34) | 115.3    |
| C(34)-C(35)-N(4)  | 128.0(5) |
| C(34)-C(35)-C(36) | 123.5(5) |
| N(4)-C(35)-C(36)  | 108.5(4) |
| C(37)-C(36)-C(41) | 121.8(5) |
| C(37)-C(36)-C(35) | 132.0(5) |
| C(41)-C(36)-C(35) | 106.2(5) |
| C(36)-C(37)-C(38) | 117.3(5) |
| C(36)-C(37)-H(37) | 121.4    |
| C(38)-C(37)-H(37) | 121.4    |
| C(39)-C(38)-C(37) | 121.1(5) |
| C(39)-C(38)-H(38) | 119.5    |
| C(37)-C(38)-H(38) | 119.5    |
| C(38)-C(39)-C(40) | 121.7(5) |
| C(38)-C(39)-H(39) | 119.2    |
| C(40)-C(39)-H(39) | 119.2    |
| C(41)-C(40)-C(39) | 117.0(5) |
| C(41)-C(40)-H(40) | 121.5    |
| C(39)-C(40)-H(40) | 121.5    |
| C(36)-C(41)-C(40) | 121.2(5) |
| C(36)-C(41)-C(42) | 106.5(5) |
| C(40)-C(41)-C(42) | 132.3(5) |
| N(4)-C(42)-N(5)   | 124.2(5) |
| N(4)-C(42)-C(41)  | 111.9(5) |
| N(5)-C(42)-C(41)  | 123.0(5) |
| N(5)-C(43)-N(6)   | 129.1(5) |
| N(5)-C(43)-C(44)  | 120.9(5) |
| N(6)-C(43)-C(44)  | 109.7(4) |
| C(49)-C(44)-C(45) | 121.3(5) |
| C(49)-C(44)-C(43) | 106.6(4) |
| C(45)-C(44)-C(43) | 132.2(5) |
| C(44)-C(45)-C(46) | 117.8(5) |
| C(44)-C(45)-H(45) | 121.1    |
| C(46)-C(45)-H(45) | 121.1    |
| C(45)-C(46)-C(47) | 121.1(5) |
| C(45)-C(46)-H(46) | 119.5    |
| C(47)-C(46)-H(46) | 119.5    |

|                     |          |
|---------------------|----------|
| C(48)-C(47)-C(46)   | 120.6(6) |
| C(48)-C(47)-H(47)   | 119.7    |
| C(46)-C(47)-H(47)   | 119.7    |
| C(47)-C(48)-C(49)   | 118.3(5) |
| C(47)-C(48)-H(48)   | 120.8    |
| C(49)-C(48)-H(48)   | 120.8    |
| C(44)-C(49)-C(48)   | 120.9(5) |
| C(44)-C(49)-C(50)   | 106.7(4) |
| C(48)-C(49)-C(50)   | 132.5(5) |
| C(51)-C(50)-N(6)    | 128.8(5) |
| C(51)-C(50)-C(49)   | 122.4(5) |
| N(6)-C(50)-C(49)    | 108.8(4) |
| C(50)-C(51)-C(52)   | 129.5(5) |
| C(50)-C(51)-H(51)   | 115.3    |
| C(52)-C(51)-H(51)   | 115.3    |
| O(4)-C(52)-C(51)    | 125.0(5) |
| O(4)-C(52)-C(53)    | 116.8(5) |
| C(51)-C(52)-C(53)   | 118.2(5) |
| S(4B)-C(53)-C(52)   | 128.1(5) |
| C(54A)-C(53)-C(52)  | 128.1(5) |
| S(4B)-C(53)-C(54B)  | 114.3(4) |
| C(52)-C(53)-C(54B)  | 117.6(4) |
| C(54A)-C(53)-S(4A)  | 114.3(4) |
| C(52)-C(53)-S(4A)   | 117.6(4) |
| C(55)-C(54A)-C(53)  | 103.7(5) |
| C(55)-C(54A)-H(54A) | 128.1    |
| C(53)-C(54A)-H(54A) | 128.1    |
| C(56)-S(4A)-C(53)   | 92.2(4)  |
| C(55)-S(4B)-C(53)   | 103.7(5) |
| C(56)-C(54B)-C(53)  | 92.2(4)  |
| C(56)-C(54B)-H(54B) | 133.9    |
| C(53)-C(54B)-H(54B) | 133.9    |
| C(56)-C(55)-C(54A)  | 115.6(6) |
| C(56)-C(55)-S(4B)   | 115.6(6) |
| C(56)-C(55)-H(55)   | 122.2    |
| C(54A)-C(55)-H(55)  | 122.2    |
| C(55)-C(56)-S(4A)   | 114.2(5) |
| C(55)-C(56)-C(54B)  | 114.2(5) |
| C(55)-C(56)-H(56)   | 122.9    |
| S(4A)-C(56)-H(56)   | 122.9    |

|                     |          |
|---------------------|----------|
| O(5)-C(57)-H(57A)   | 109.5    |
| O(5)-C(57)-H(57B)   | 109.5    |
| H(57A)-C(57)-H(57B) | 109.5    |
| O(5)-C(57)-H(57C)   | 109.5    |
| H(57A)-C(57)-H(57C) | 109.5    |
| H(57B)-C(57)-H(57C) | 109.5    |
| C(14)-N(1)-C(7)     | 108.1(4) |
| C(14)-N(1)-Ag(1)    | 124.8(3) |
| C(7)-N(1)-Ag(1)     | 127.0(3) |
| C(15)-N(2)-C(14)    | 131.6(5) |
| C(15)-N(3)-C(22)    | 107.8(4) |
| C(15)-N(3)-Ag(2)    | 124.1(3) |
| C(22)-N(3)-Ag(2)    | 123.4(3) |
| C(42)-N(4)-C(35)    | 107.0(4) |
| C(42)-N(4)-Ag(2)    | 125.3(3) |
| C(35)-N(4)-Ag(2)    | 127.7(3) |
| C(43)-N(5)-C(42)    | 131.8(5) |
| C(43)-N(6)-C(50)    | 108.2(4) |
| C(43)-N(6)-Ag(1)    | 125.4(3) |
| C(50)-N(6)-Ag(1)    | 123.0(3) |
| C(57)-O(5)-H(5)     | 109.5    |
| C(5)-O(1)-Ag(1)     | 126.9(3) |
| C(24)-O(2)-Ag(2)    | 123.0(4) |
| C(33)-O(3)-Ag(2)    | 129.0(3) |
| C(52)-O(4)-Ag(1)    | 122.5(4) |
| C(28)-S(2)-C(25)    | 91.2(4)  |
| C(29)-S(3)-C(32)    | 92.4(3)  |

---
